# Supplementary material for: A self-assembled hexadecanuclear 4 × [2 × 2] Mn(ii)16square grid from a pyridazine bis(hydrazone) ligand: synthesis, structure and magnetism
Source: Royal Society of Chemistry journal article supplement (doi:10.1039/b611267f), 2006-01-01
Supplement: b611267f.pdf [file b611267f.pdf]

## A self-assembled hexa-decanuclear 4 x [2x2] Mn(II)<sub>16</sub> square grid from a pyridazine bis-hydrazone ligand – synthesis, structure and magnetism

Subrata K. Dey, Laurence K. Thompson, and Louise N. Dawe

### Supplementary Material

Synthesis of ligand L1.

Pyridine 2-carboxyldehyde (20.5 mmol) was added to a solution of pyridazine-dicarboxylic acid hydrazide (10 mmol) (prepared from the reaction of dimethyl 3,6-pyridazinedicarboxylate<sup>S1,S2</sup> with hydrazine (98%) in dry methanol), and the resulting mixture heated under reflux for 5 hours (at ~80°C). A white powder started to form while the reaction mixture was hot, which was filtered off after cooling, washed with dry methanol and Et<sub>2</sub>O and dried under vacuum. Yield (>95%), m.pt. 275 °C, <sup>1</sup>H NMR (500 MHz, DMSO-d<sub>6</sub>): δ = 12.84 (s, 2H, H3, H3'), 8.76 (s, 2H, H4, H4'), 8.66 (d, 2H, H1, H2), 8.52 (d, 2H, H8, H8'), 8.04 (d, 2H, H5, H5'), 7.94 (dd, 2H, H7, H7') and 7.46 ppm (dd, 2H, H6, H6'); IR/cm<sup>-1</sup> (mull): 3313, 3286 (ν NH), 1700 (ν C=O), 1596 (ν C=N, imine), 1576 (ν C=N, arom), 1126, 917 (ν py); mass spectrum (M/z) (APCI): 375.35 (M + H)<sup>+</sup>; Elemental analysis calcd (%) for C<sub>18</sub>H<sub>14</sub>N<sub>8</sub>O<sub>2</sub>: C, 57.73; H, 3.74; N, 29.94; found: C, 57.31; H, 3.88; N, 30.05.

### References

- S1. G.H. Spencer, Jr., P.C. Cross, K.B. Wiberg, J. Chem. Phys., 1961, **35**, 1944.
- S2. S. Sueur, M. Lagrenee, F. Abraham, J. Heterocyclic Chem., 1987, **24**, 1285.

[2x2]

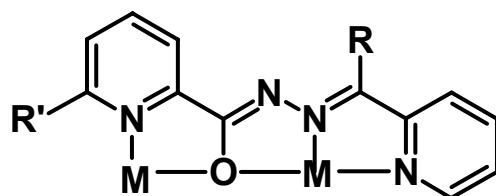

poap (R=NH<sub>2</sub>,R'=H)  
pomp (R=CH<sub>3</sub>,R'=H)  
mpoap (R=NH<sub>2</sub>, R'=CH<sub>3</sub>)

[3x3]

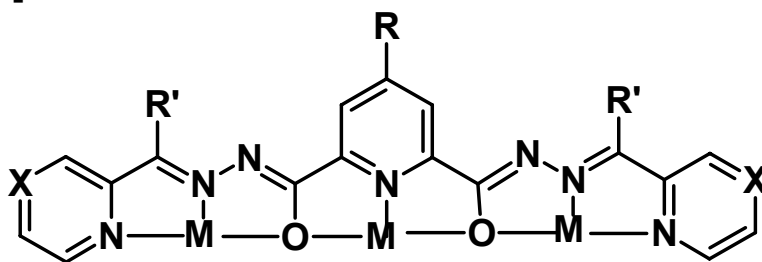

[R'=NH<sub>2</sub>] 2poap (R=H,X=CH),2poapz (R=H,X=N)  
Cl<sub>2</sub>poap (R=Cl,X=CH),S<sub>2</sub>poap (R=S<sup>-</sup>,X=CH)  
SEt<sub>2</sub>poap (R=SEt,X=CH), SMe<sub>2</sub>poap (R=SMe,X=CH);  
[R'=CH<sub>3</sub>] 2pomp (R=H,X=CH),Cl<sub>2</sub>pomp(R=Cl,X=CH);  
[R'=Ph] Cl<sub>2</sub>popp (R=Cl,X=CH)

[Cu<sub>36</sub>]

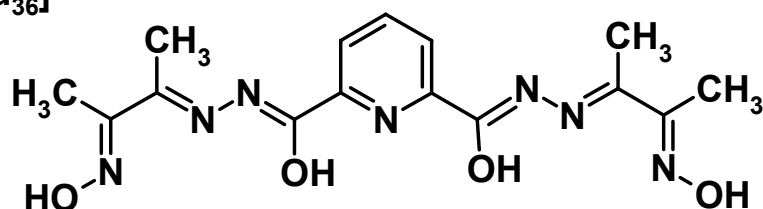

dpocco

Fig. S1. Ditopic and tritopic picolinic hydrazone ligands.
